# Supplementary material
Source: MDPI journal article supplement (https://www.mdpi.com/2311-5637/8/8/387)
Supplement: s1 [file s1]

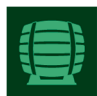

---

Supplementary Material

# Nitrification upon Nitrogen Starvation and Recovery: Effect of Stress Period, Substrate Concentration and pH on Ammonia Oxidizers' Performance

Leila Abbaszadeh <sup>1</sup>, Eleni Koutra <sup>1</sup>, Konstantina Tsigkou <sup>1</sup>, Maria Gaspari <sup>2</sup>, Panagiotis G. Kougias <sup>2</sup>  
and Michael Kornaros <sup>1,\*</sup>

<sup>1</sup> Laboratory of Biochemical Engineering & Environmental Technology (LBEET), Department of Chemical Engineering, University of Patras, 26504 Patras, Greece

<sup>2</sup> Soil and Water Resources Institute, Hellenic Agricultural Organisation Demeter, Thessaloniki, 57001 Thessaloniki, Greece

\* Correspondence: kornaros@chemeng.upatras.gr

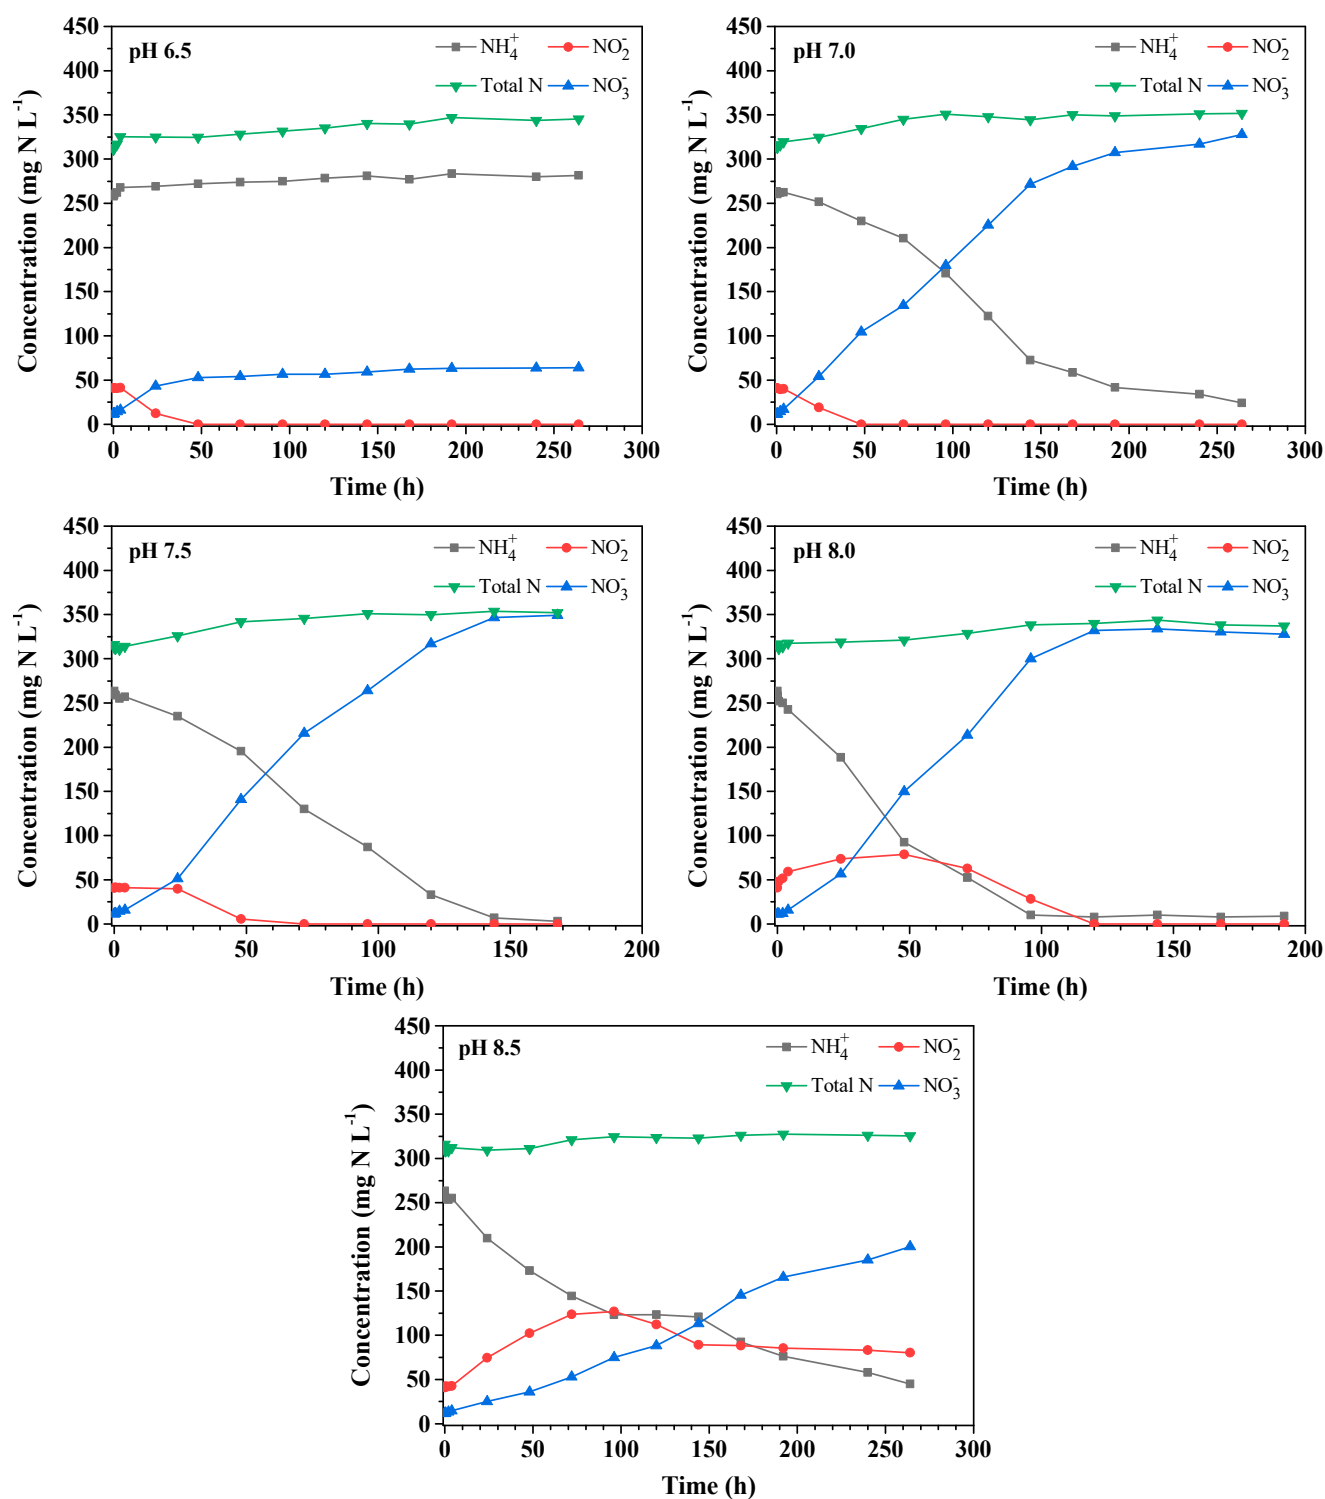

**Figure S1.** The process of nitrification performed by non-starved cells of enriched nitrifying cultures at different pH values. Incubation conditions included temperature of 25 °C, initial addition of  $\text{NH}_4\text{-N}$  concentration of 250  $\text{mg N L}^{-1}$ , and cell density of 500  $\text{mg TSS L}^{-1}$ , equivalent to  $1.29 \times 10^9$  cells  $\text{mL}^{-1}$ .

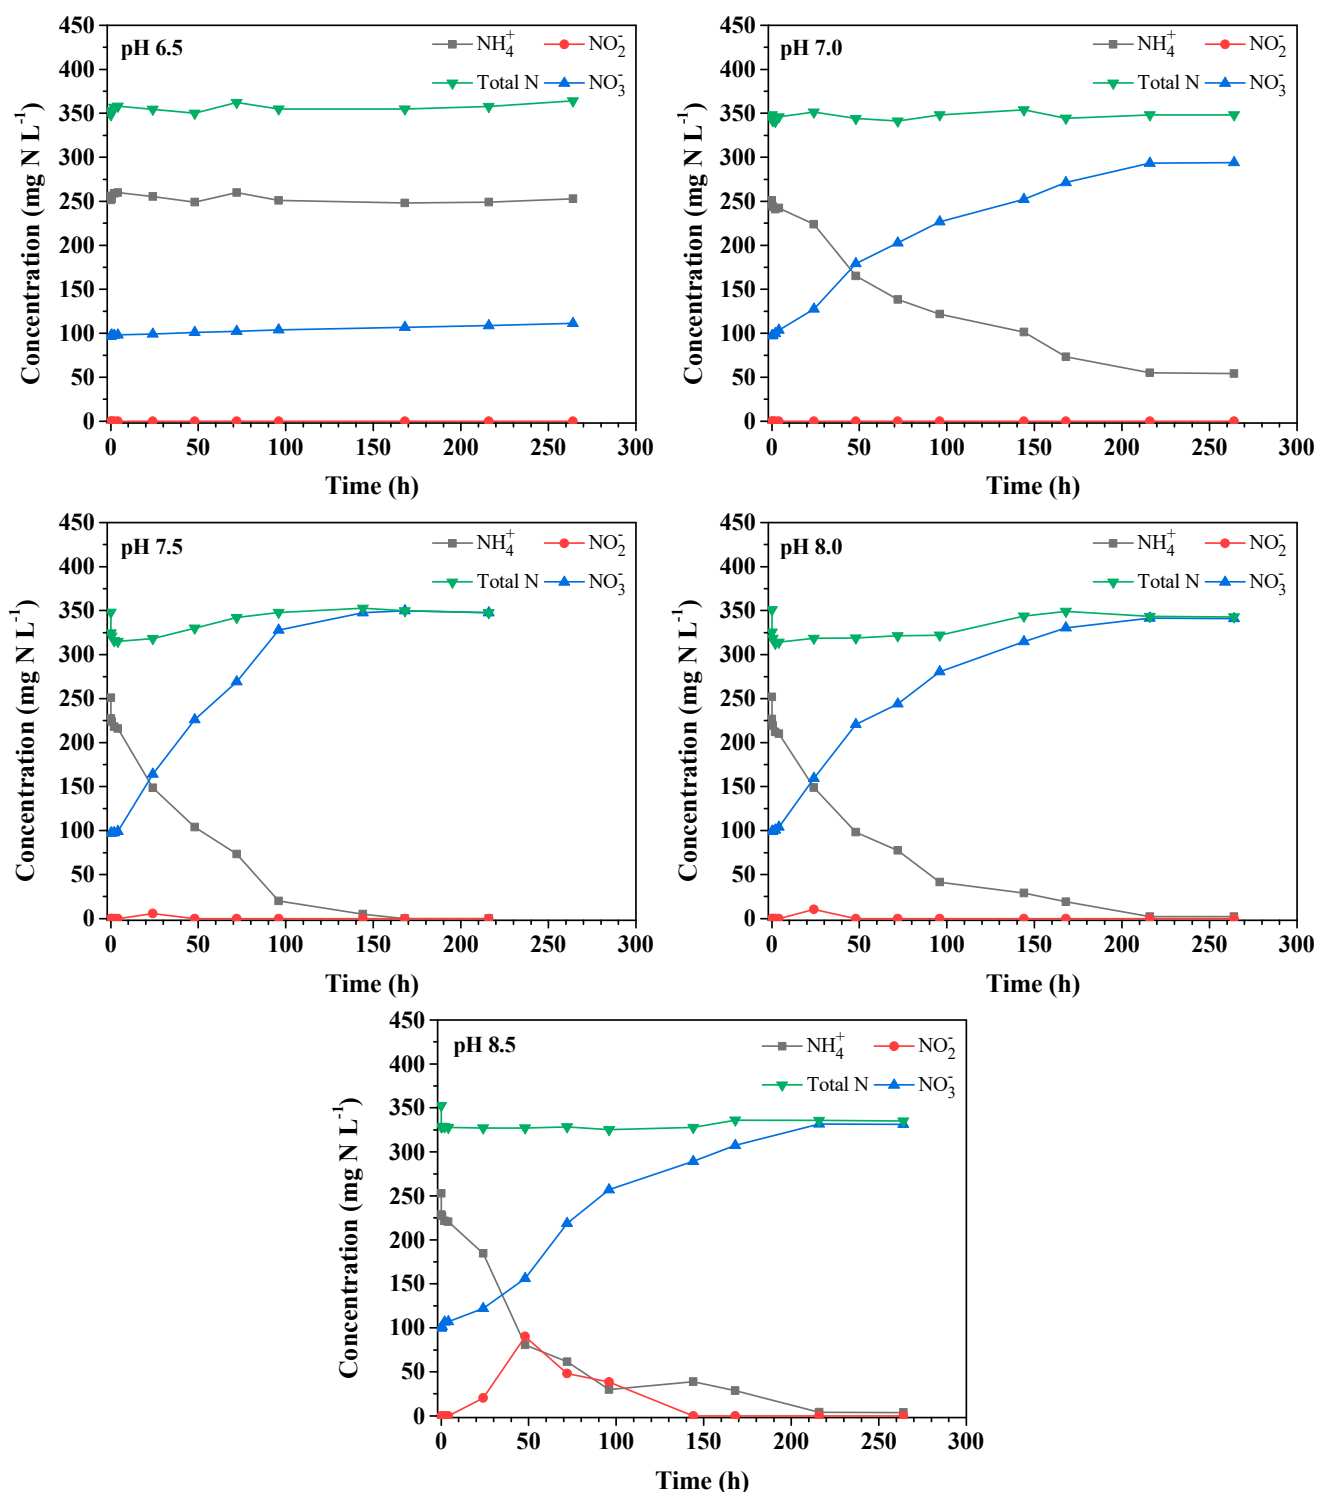

**Figure S2.** The process of nitrification performed by 3-days starved cells of enriched nitrifying cultures at different pH values. Incubation conditions included temperature of 25 °C, initial addition of  $\text{NH}_4\text{-N}$  concentration of 250 mg N L<sup>-1</sup>, and cell density of 500 mg TSS L<sup>-1</sup>, equivalent to  $1.29 \times 10^9$  cells mL<sup>-1</sup>.
